# Supplementary material
Source: MDPI journal article supplement (https://www.mdpi.com/2077-1312/11/10/2024)
Supplement: s1 [file s1]

## Supplementary Materials

### ***Emericellopsis maritima* and *Purpureocillium lilacinum* marine fungi as a source of functional fractions with antioxidant and antitumor potential in colorectal cancer: a preliminary study**

**Table S1.** Primer sequence used in the real-time quantitative.

| Gene  |         | Primer sequence (5' → 3') |
|-------|---------|---------------------------|
| CD44  | Forward | TTATCAGGAGACCAAGACAC      |
|       | Reverse | ATCAGCCATTCTGGAATTTG      |
| CD24  | Forward | CAGTAGTCTTGATGACCAAAG     |
|       | Reverse | ACAGCATTCTGGAATAAAGC      |
| NANOG | Forward | CCAGAACCAGAGAATGAAATC     |
|       | Reverse | TGGTGGTAGGAAGAGTAAAG      |
| SOX2  | Forward | GATCCTGGACTTCTTTTTGG      |
|       | Reverse | TCTATACAAGGTCCATTCCC      |
| CD133 | Forward | CAGTATCAATTCAGTGCTAGG     |
|       | Reverse | CTTAATCTCATCAAGAACAGGG    |
| OCT4  | Forward | CAACAATATCCACTTTACCAGAG   |
|       | Reverse | GATCACCCCTGGGATATACAC     |
| GADPH | Forward | TCGGAGTCAACGGATTTG        |
|       | Reverse | CAACAATATCCACTTTACCAGAG   |

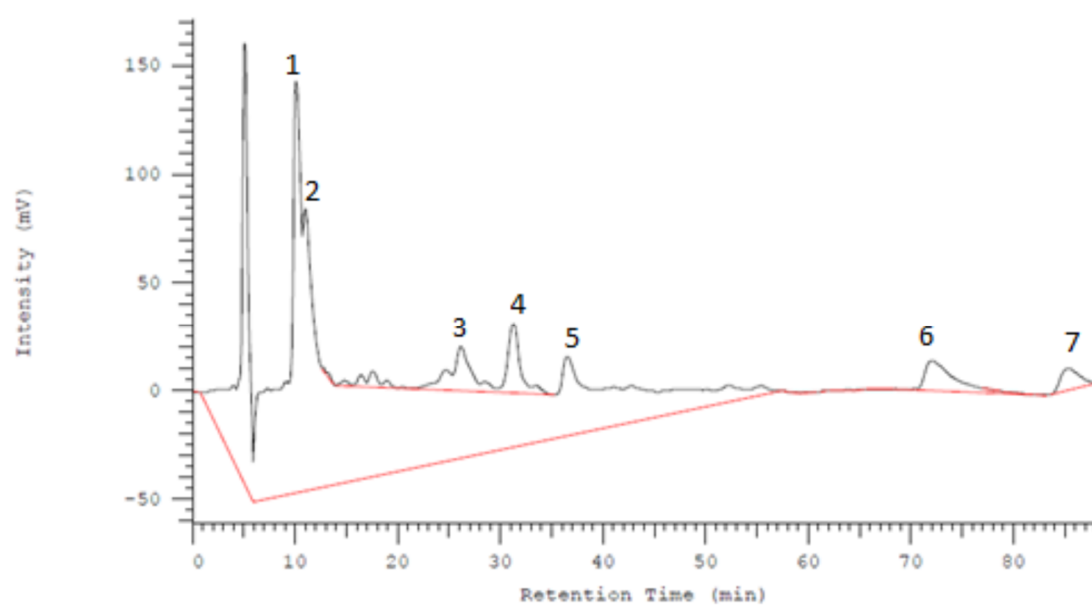

**Figure S1.** HPLC analysis from fraction Fr-EM3. Compounds **1**, **2**, and **3** are picks 5, 6, and 7 respectively.

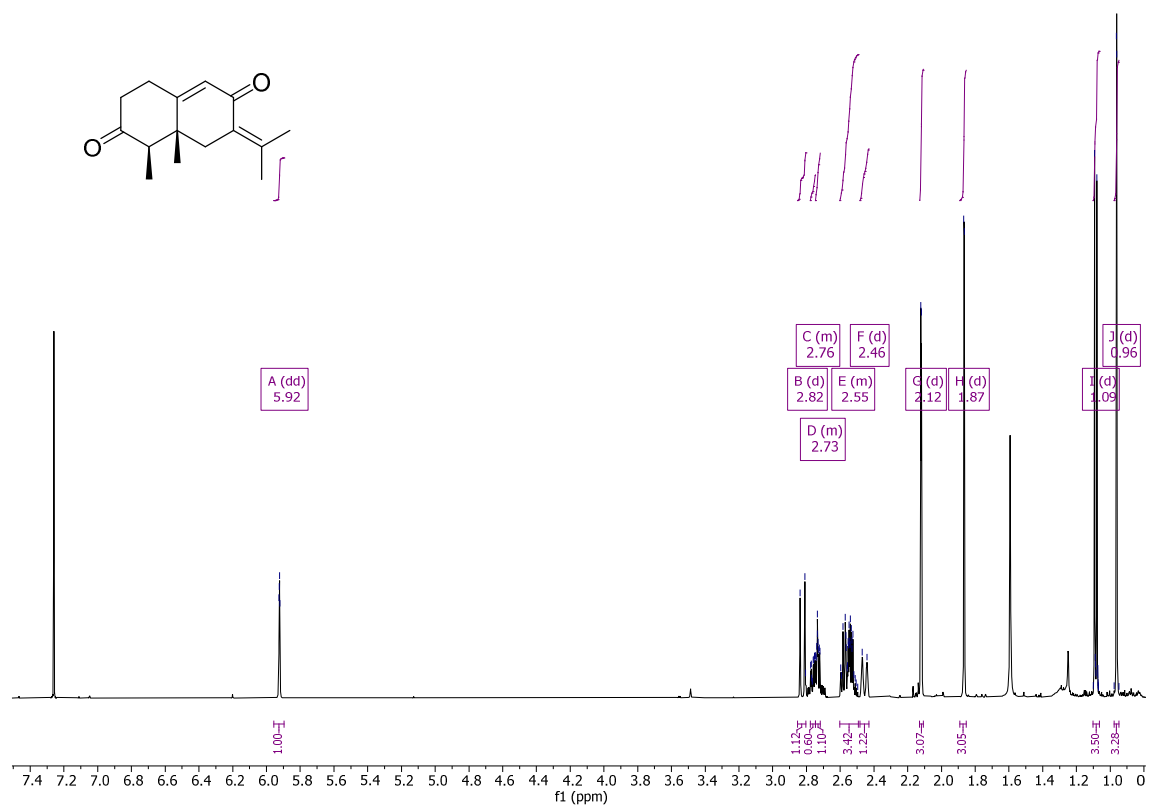

**Figure S2.** <sup>1</sup>H-NMR from compound **1** in CDCl<sub>3</sub>.

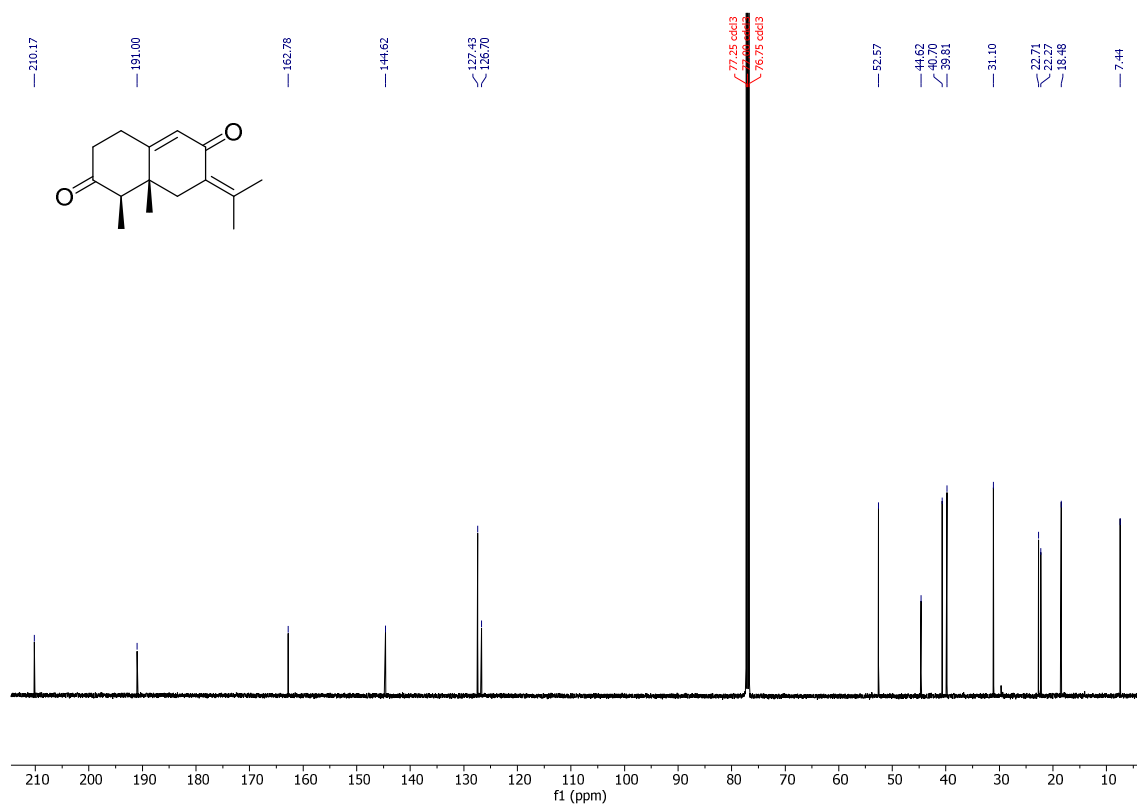

**Figure S3.** <sup>13</sup>C-NMR from compound **1** in CDCl<sub>3</sub>.

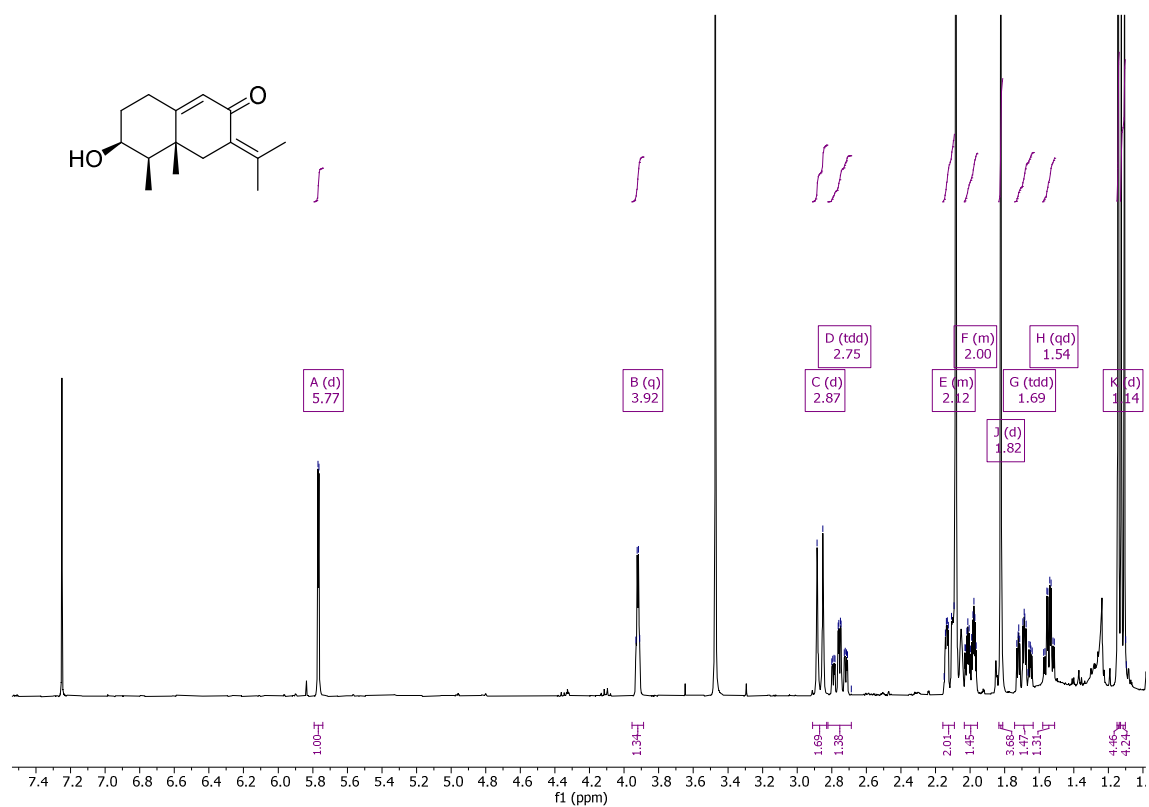

**Figure S4.** <sup>1</sup>H-NMR from compound **2** in CDCl<sub>3</sub>.

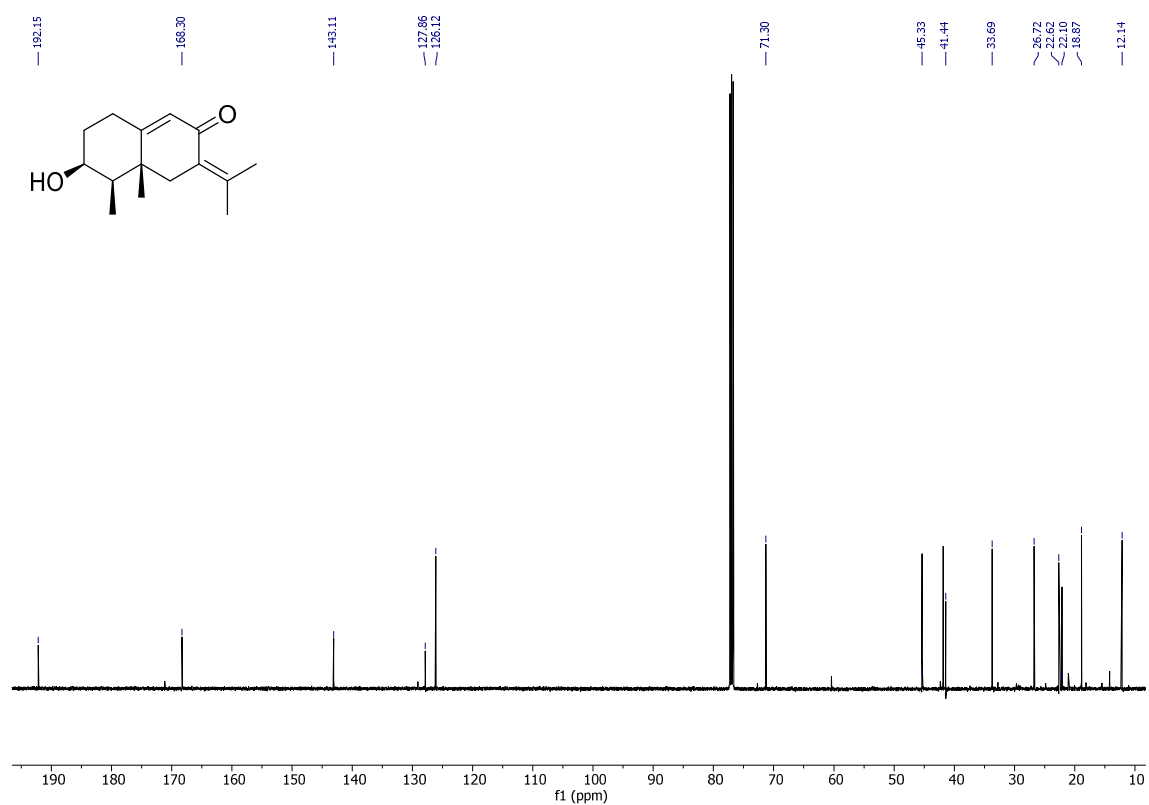

**Figure S5.** <sup>13</sup>C-NMR from compound **2** in CDCl<sub>3</sub>.

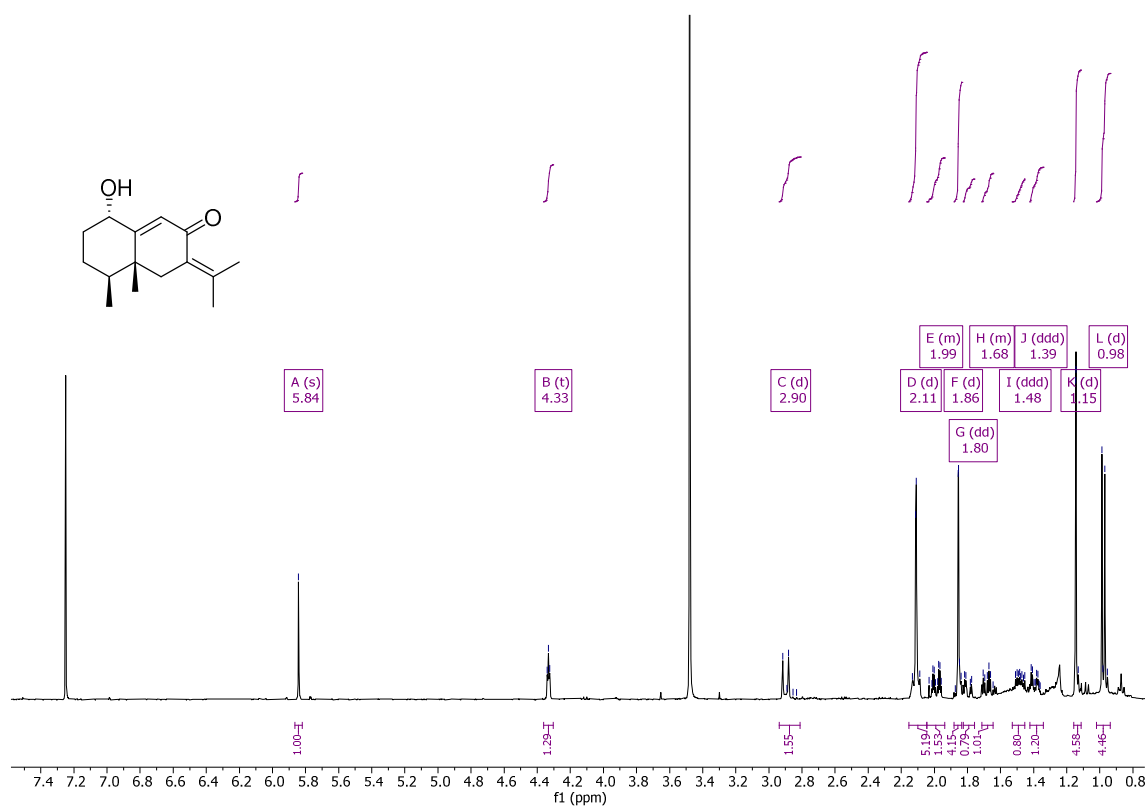

**Figure S6.** <sup>1</sup>H-NMR from compound **3** in CDCl<sub>3</sub>.

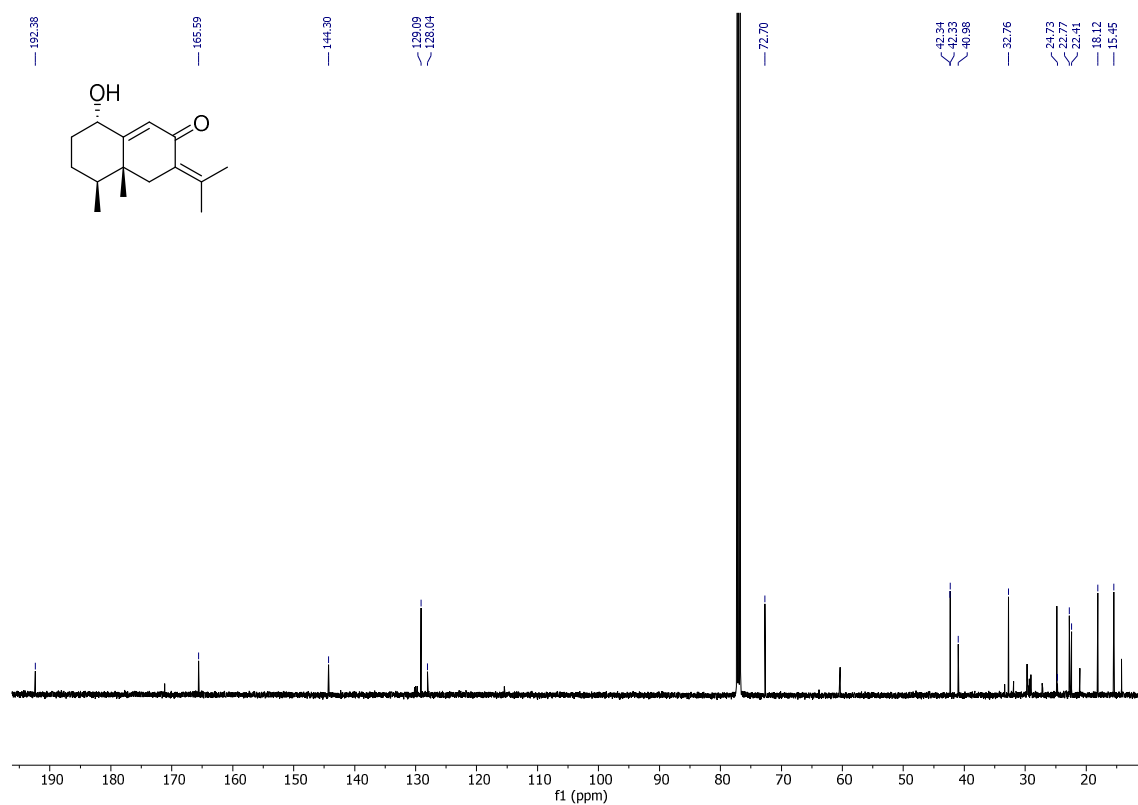

**Figure S7.** <sup>13</sup>C-NMR from compound **3** in CDCl<sub>3</sub>.



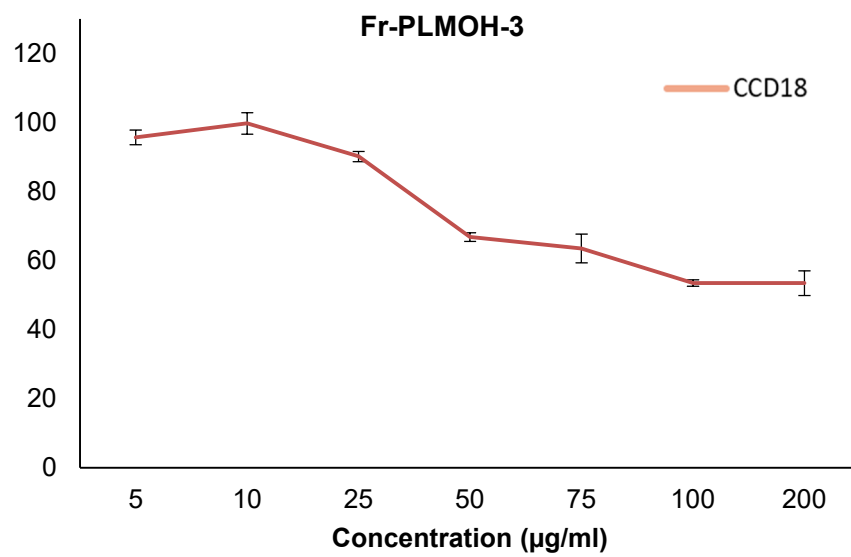

**Figure S8.** Cytotoxicity activity expressed as relative proliferation in CCD18 non- tumor cell line. Data are represented as mean  $\pm$  standard deviation of triplicate cultures.

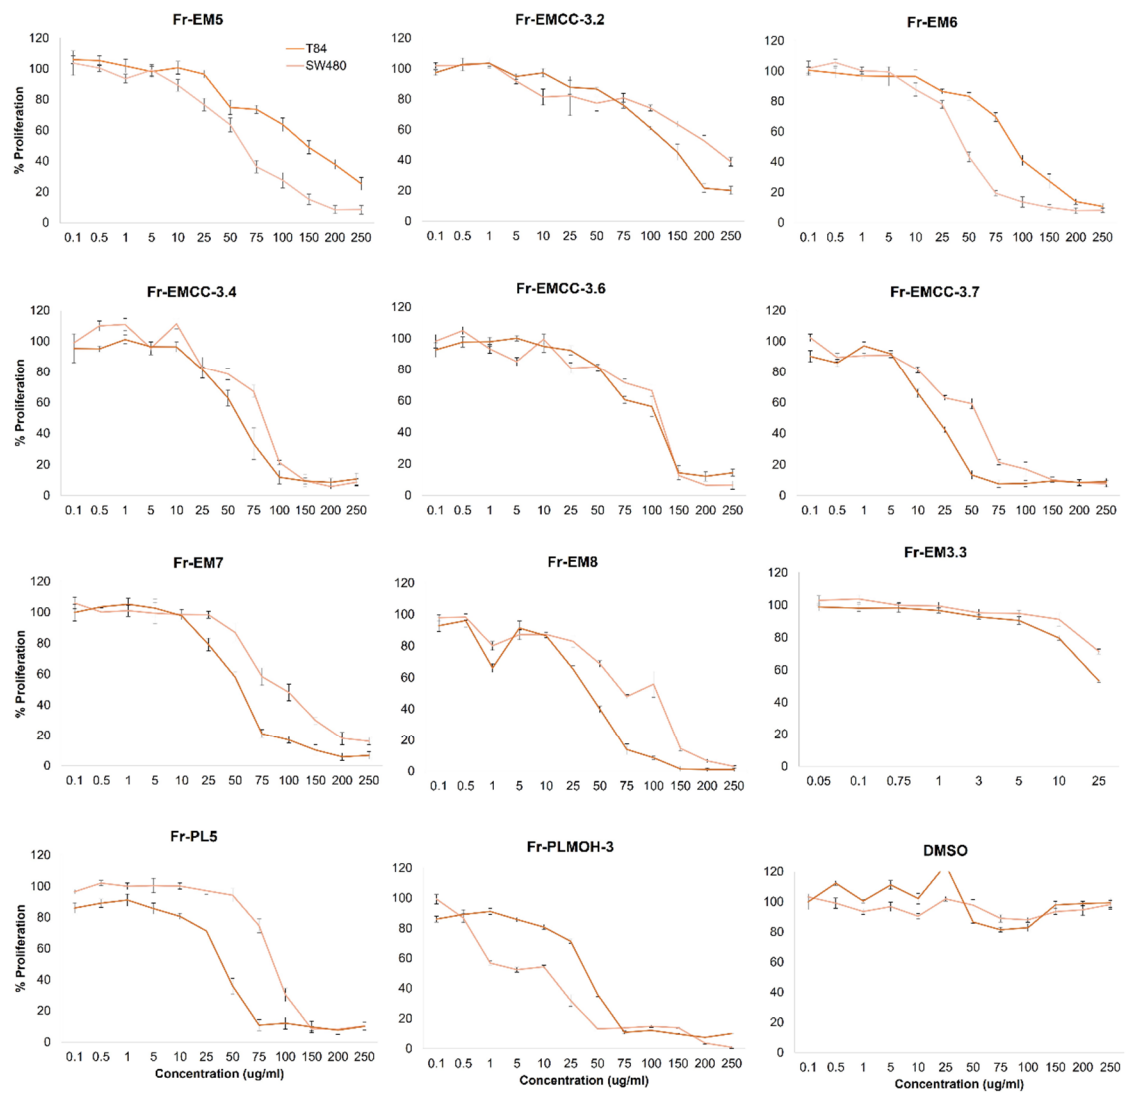

**Figure S9.** Proliferation assay in T84 and SW480 CRC cell lines treated with functional fractions obtained from the fermentation of marine-derived fungi *Emericellopsis maritima* and *Purpureocillium lilacinum*. DMSO was used as a solvent for all samples. Data are represented as mean  $\pm$  standard deviation of triplicate cultures.

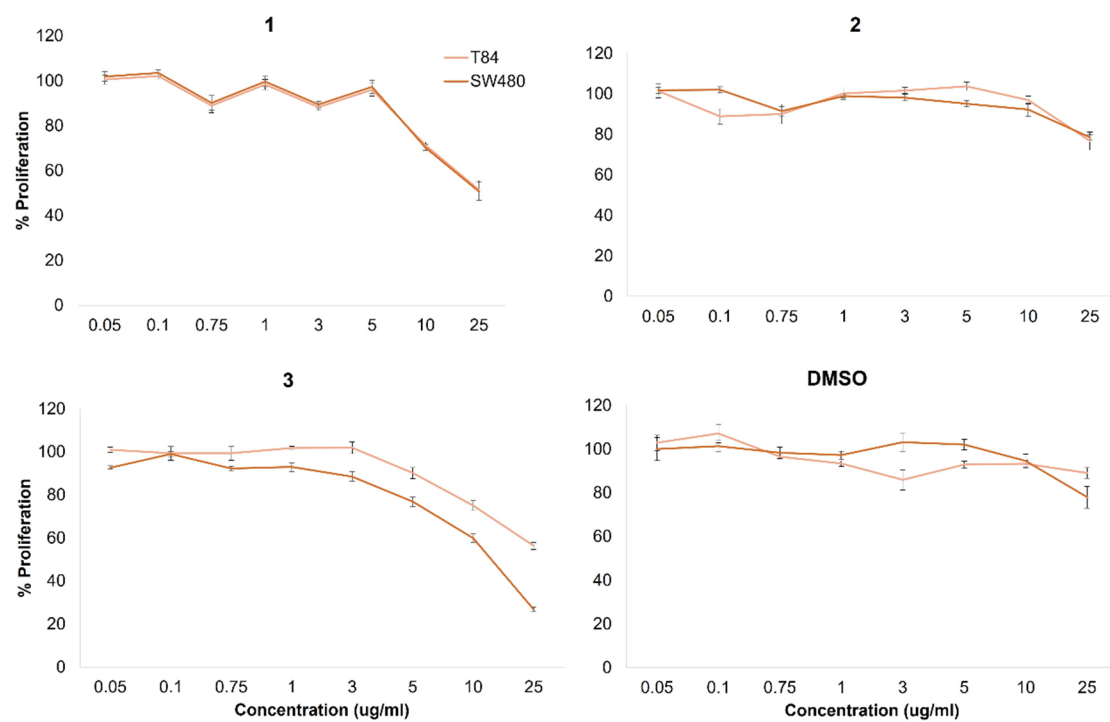

**Figure S10.** Proliferation assay in T84 and SW480 CRC cell lines treated with compounds from the fermentation broth of marine-derived fungus *Emericellopsis maritima*. DMSO was used as solvent for all samples. Data are represented as mean  $\pm$  standard deviation of triplicate cultures.
